# Supplementary material for: Association of social determinants, lifestyle, and metabolic factors with mortality in Chinese adults: A nationwide 10-year prospective cohort study
Source: PubMed Central journal article supplement — Cell Rep Med. 2024 Jul 26;5(8):101656. doi: 10.1016/j.xcrm.2024.101656 (PMC11384959; doi:10.1016/j.xcrm.2024.101656), 2024-07-26
Supplement: mmc1.pdf [file mmc1.pdf]

**Supplemental information**

**Association of social determinants, lifestyle, and  
metabolic factors with mortality in Chinese adults:**

**A nationwide 10-year prospective cohort study**

**Jieli Lu, Mian Li, Jiang He, Yu Xu, Ruizhi Zheng, Jie Zheng, Guijun Qin, Yingfen Qin, Yuhong Chen, Xulei Tang, Zhen Ye, Min Xu, Tiange Wang, Lixin Shi, Qing Su, Xuefeng Yu, Li Yan, Zhiyun Zhao, Qin Wan, Gang Chen, Zhengnan Gao, Guixia Wang, Feixia Shen, Xuejiang Gu, Zuojie Luo, Li Chen, Xinguo Hou, Yanan Huo, Qiang Li, Hong Qiao, Yinfei Zhang, Tianshu Zeng, Chunyan Hu, Qiuyu Cao, Xiaojing Jia, Chao Liu, Youmin Wang, Shengli Wu, Tao Yang, Huacong Deng, Hongyan Qi, Xueyan Wu, Di Zhang, Meng Dai, Donghui Li, Shenghan Lai, Lulu Chen, Jiajun Zhao, Yiming Mu, Weiguo Hu, Guang Ning, Ruying Hu, Yufang Bi, Weiqing Wang, and for the 4C Study Group**

## Supplementary Figures

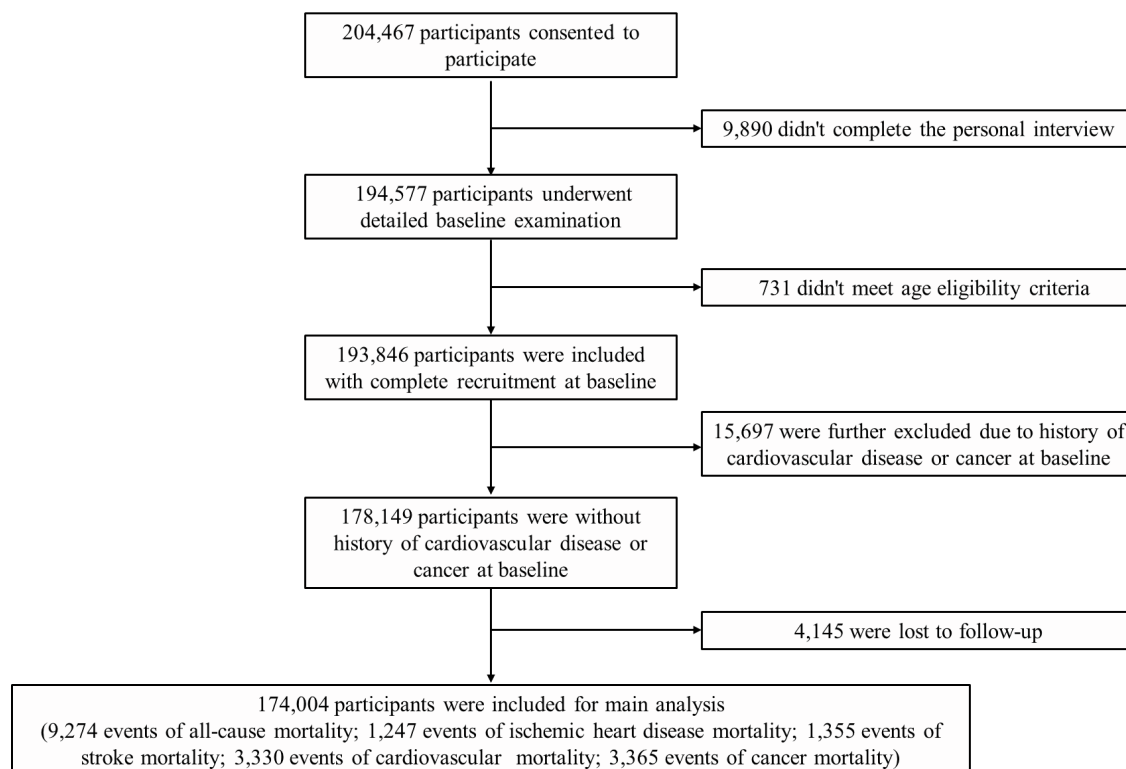

**Figure S1. Participant flow diagram of the China Cardiometabolic Disease and Cancer Cohort (4C) Study, related to Table 1.**

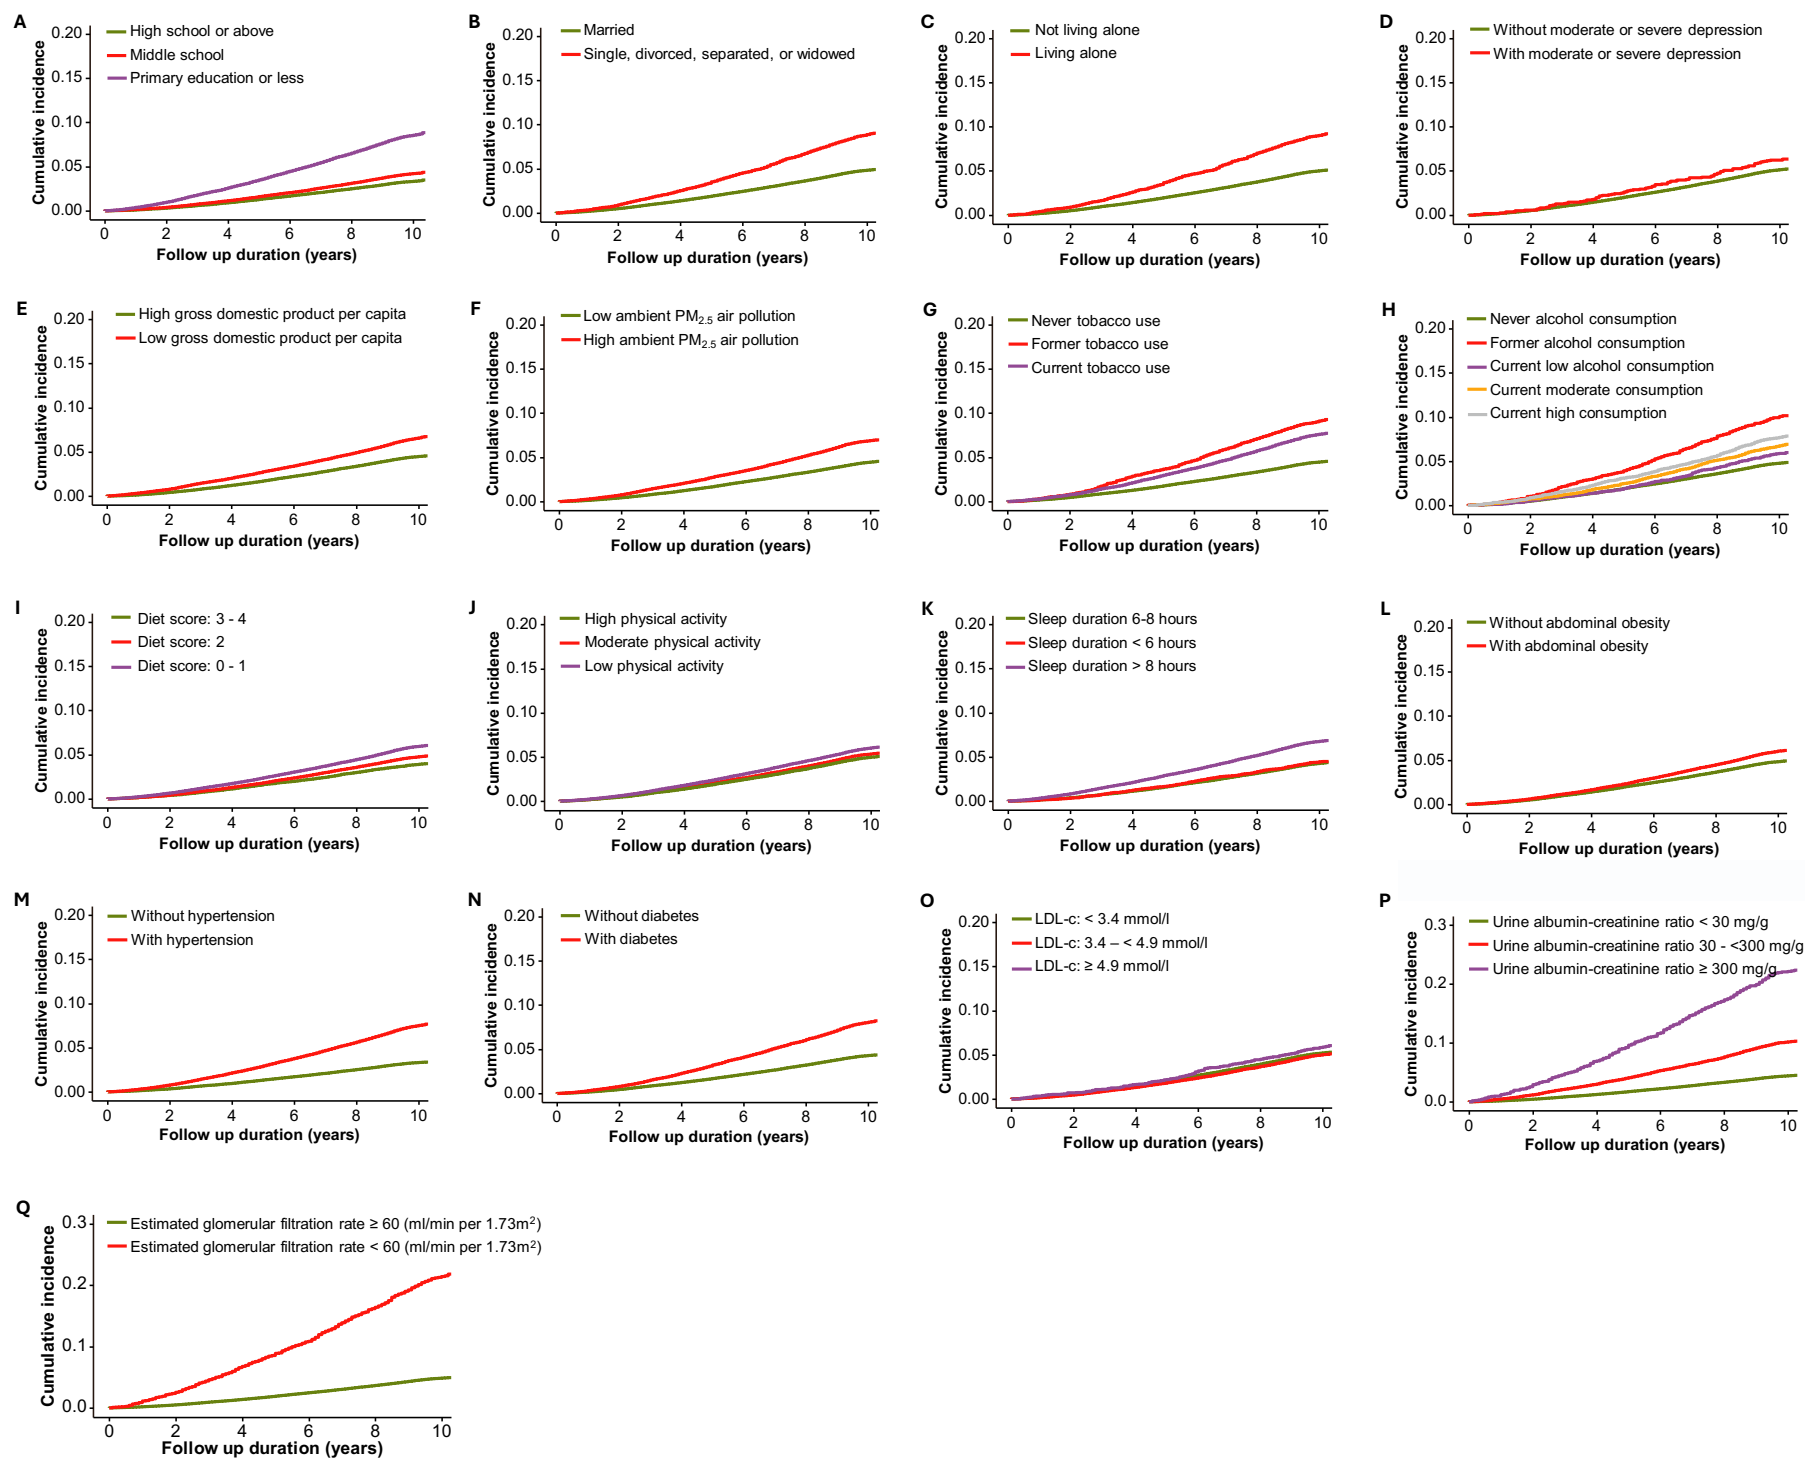

**Figure S2. Cumulative incidence of all-cause mortality with each risk factor using Kaplan-Meier analysis, related to Table 2.**

A, educational attainment; B, marital status; C, living status; D, depression status; E, gross domestic product per capita; F, ambient PM<sub>2.5</sub> air pollution; G, tobacco use; H, alcohol consumption; I, diet score; J, physical activity; K, sleep duration; L, abdominal obesity; M, hypertension; N, diabetes; O, low-density lipoprotein cholesterol; P, urine albumin-creatinine ratio; Q, estimated glomerular filtration rate

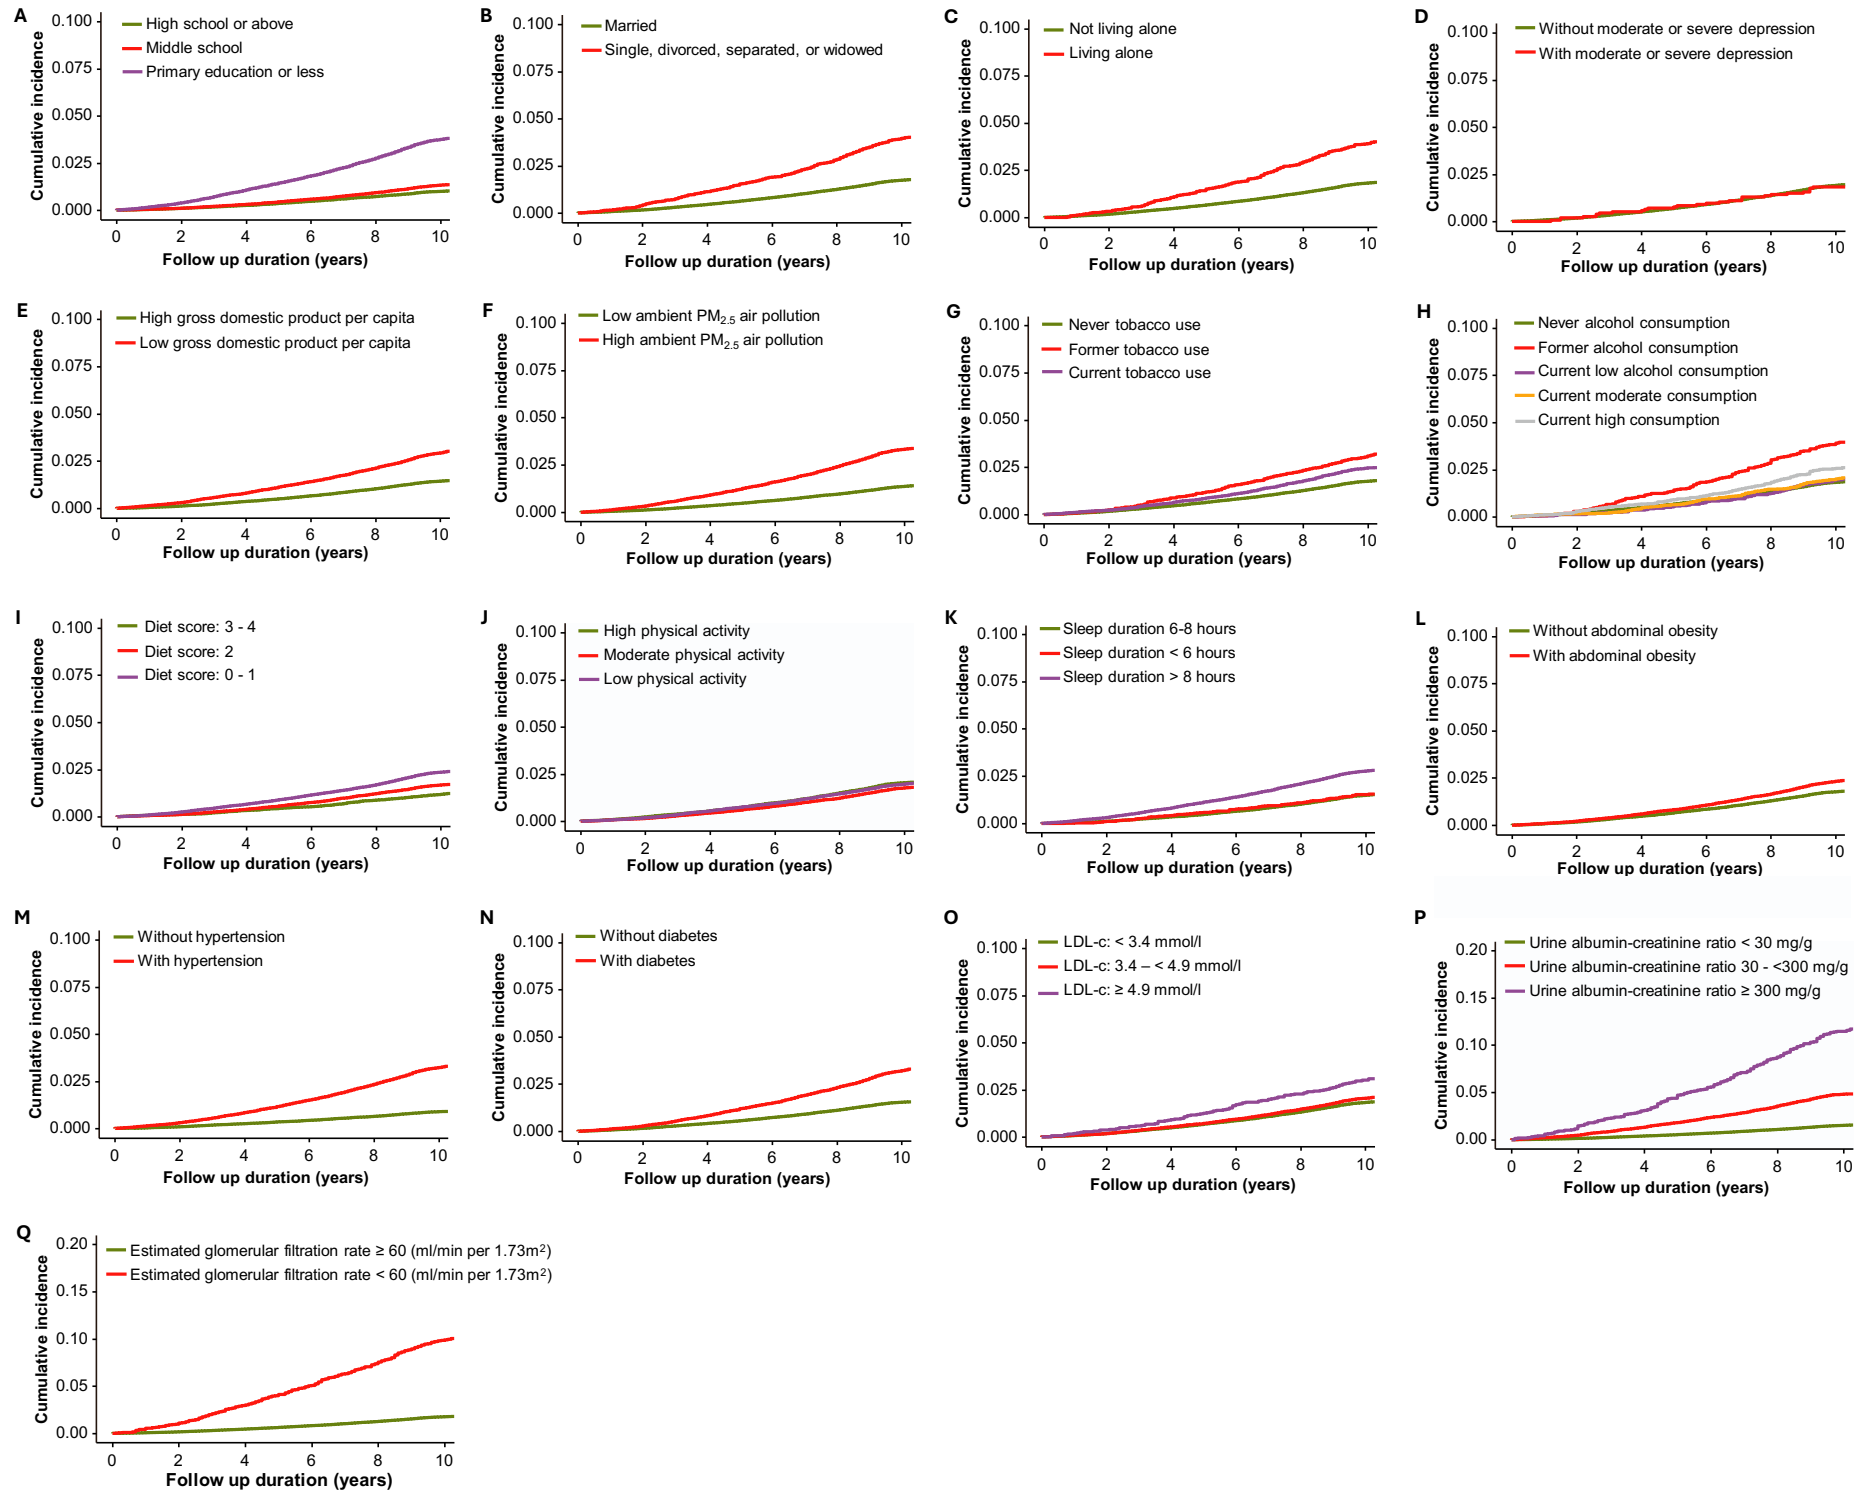

**Figure S3. Cumulative incidence of cardiovascular mortality with each risk factor using Kaplan-Meier analysis, related to Table 3.**

A, educational attainment; B, marital status; C, living status; D, depression status; E, gross domestic product per capita; F, ambient PM<sub>2.5</sub> air pollution; G, tobacco use; H, alcohol consumption; I, diet score; J, physical activity; K, sleep duration; L, abdominal obesity; M, hypertension; N, diabetes; O, low-density lipoprotein cholesterol; P, urine albumin-creatinine ratio; Q, estimated glomerular filtration rate

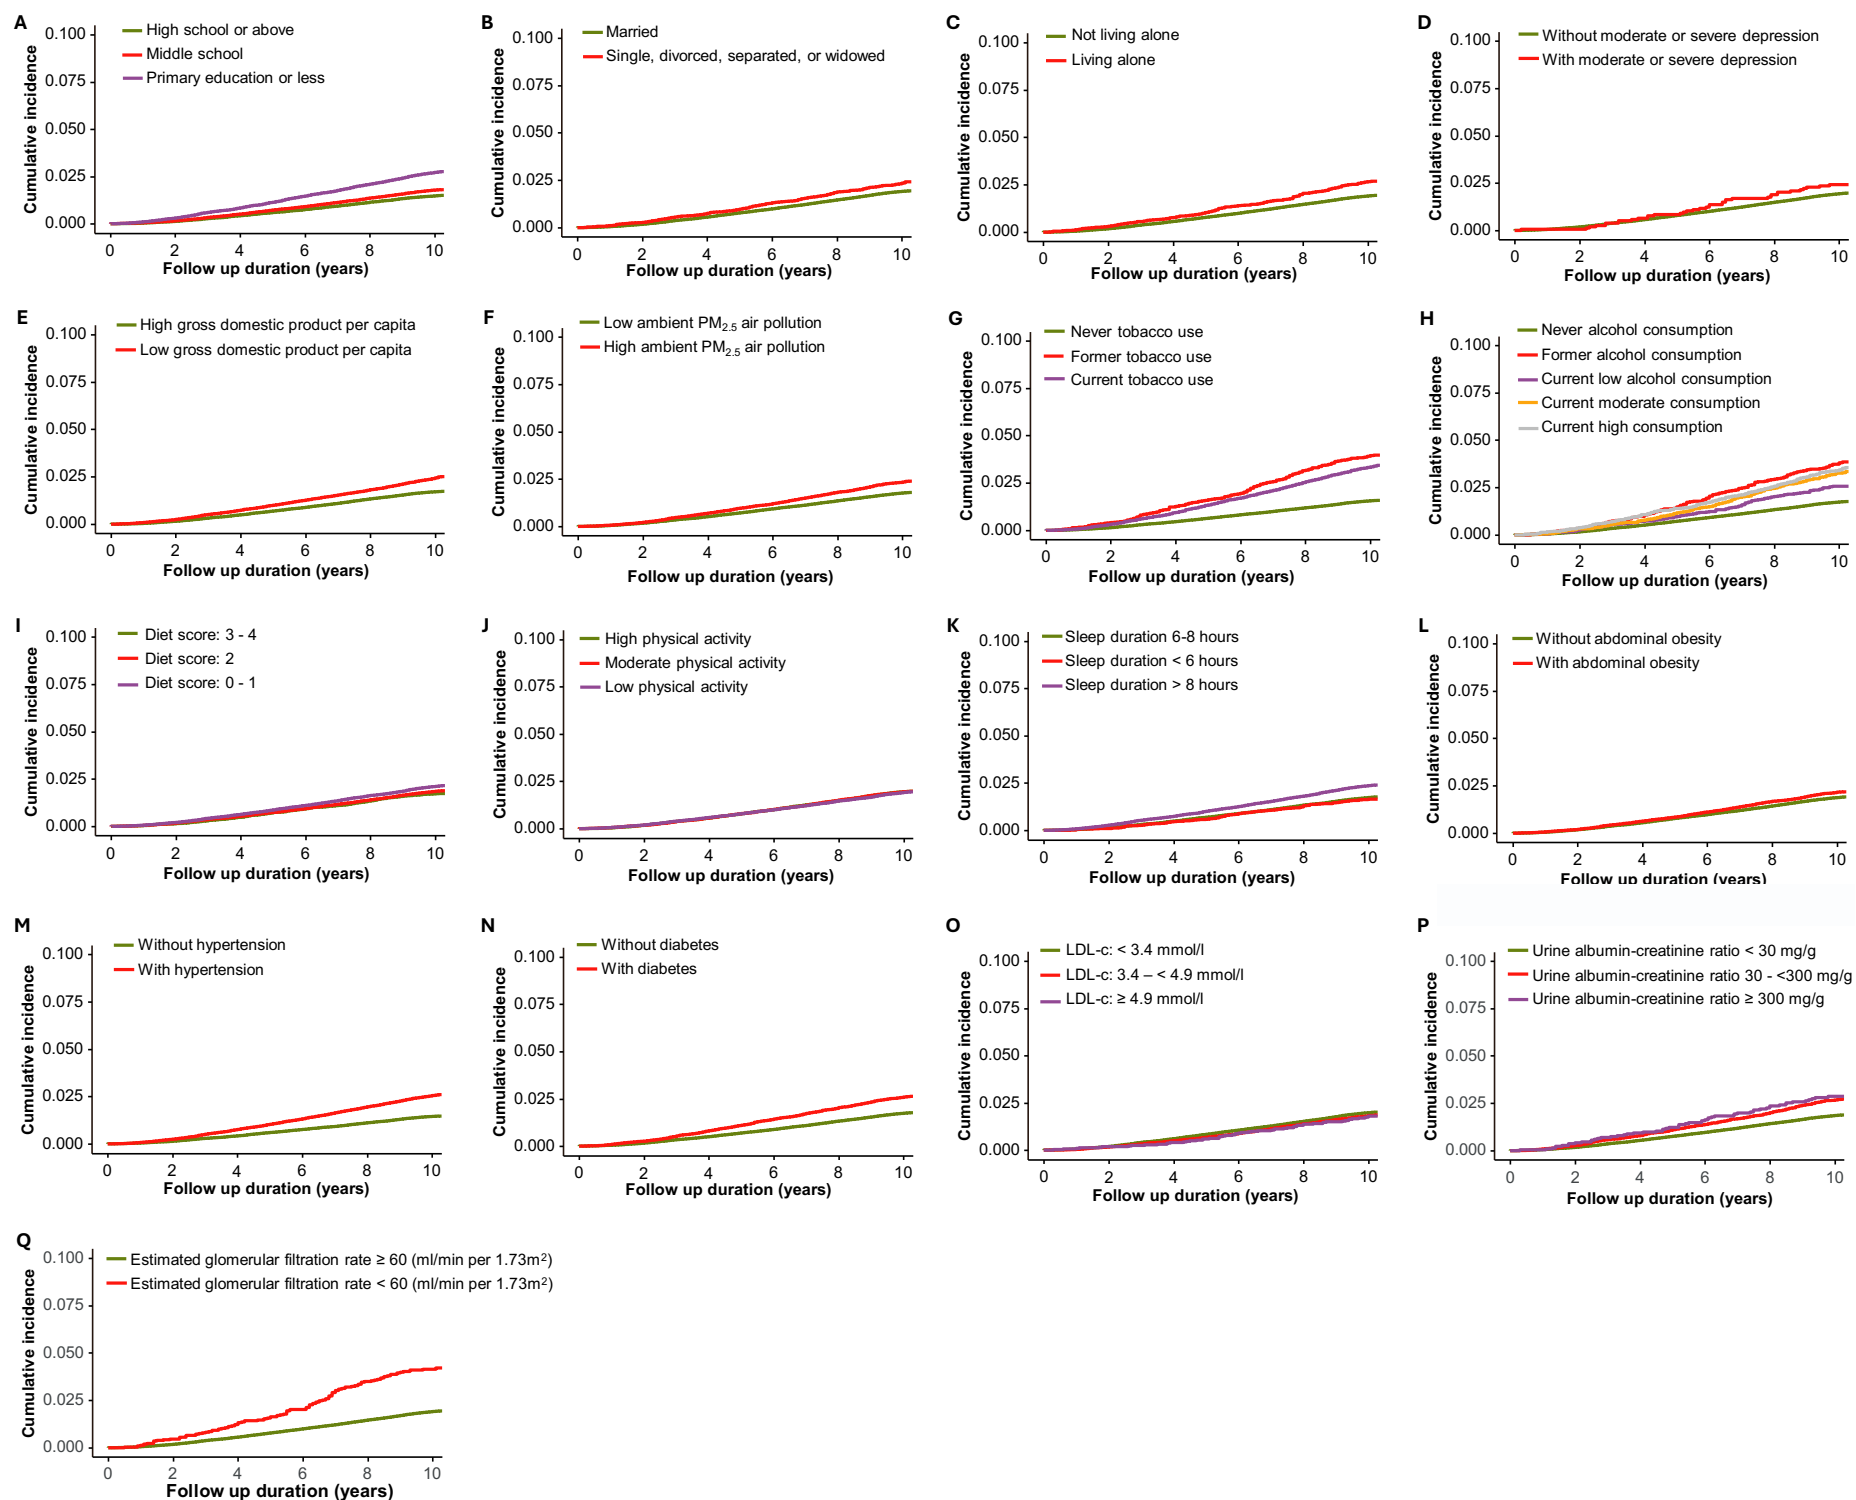

**Figure S4. Cumulative incidence of cancer mortality with each risk factor using Kaplan-Meier analysis, related to Table 4.**

A, educational attainment; B, marital status; C, living status; D, depression status; E, gross domestic product per capita; F, ambient PM<sub>2.5</sub> air pollution; G, tobacco use; H, alcohol consumption; I, diet score; J, physical activity; K, sleep duration; L, abdominal obesity; M, hypertension; N, diabetes; O, low-density lipoprotein cholesterol; P, urine albumin-creatinine ratio; Q, estimated glomerular filtration rate

**A. Cardiovascular mortality**

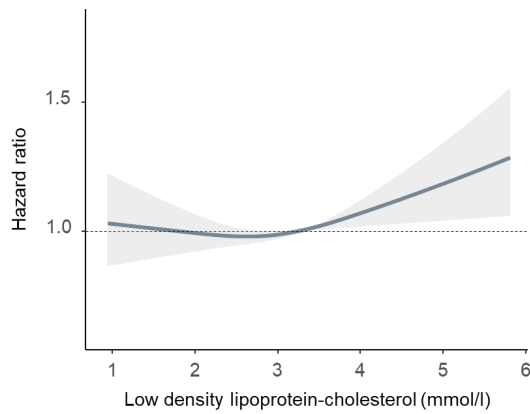

**B. Cancer mortality**

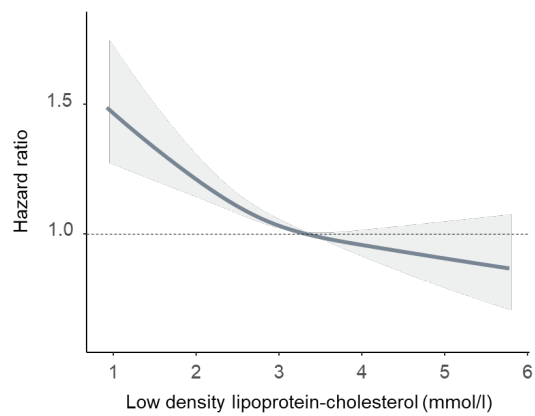

**C. Ischemic heart disease mortality**

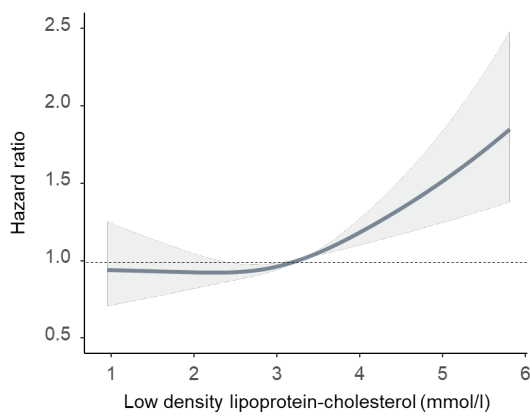

**D. Stroke mortality**

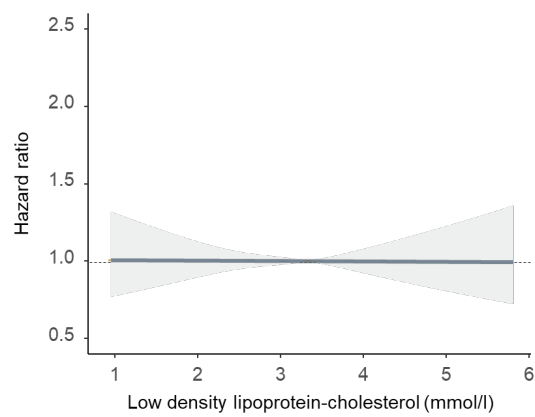

**Figure S5. Multivariable-adjusted hazard ratios for cause-specific mortalities according to levels of low-density lipoprotein cholesterol on a continuous scale, related to Table 2-4.**

Solid lines are multivariable adjusted hazard ratios, with shade showing 95% confidence intervals derived from restricted cubic spline regressions plotted with a reference value of 3.4 mmol/l for LDL-c using 3 knots at 5th, 50th, and 95th percentiles. Model was adjusted for age, sex, region and other individual risk factors. The highest and lowest 0.5% values of low-density lipoprotein cholesterol were trimmed.

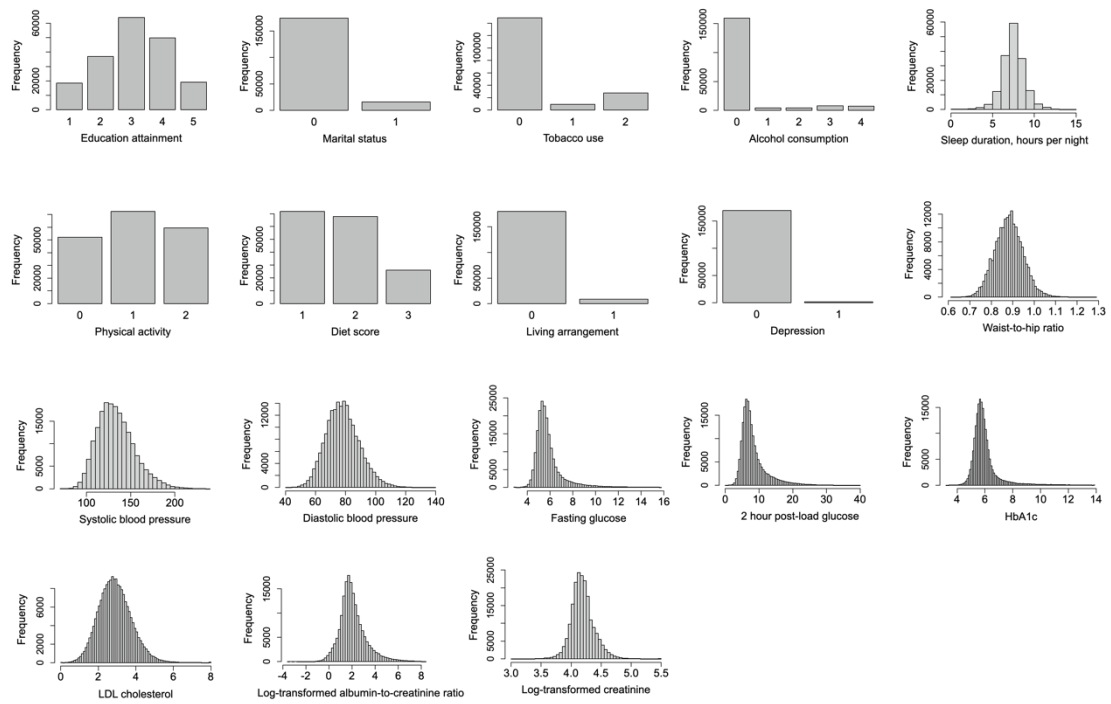

**Figure S6. Distributions of variables used as predictors in multiple imputation, related to STAR Methods.**

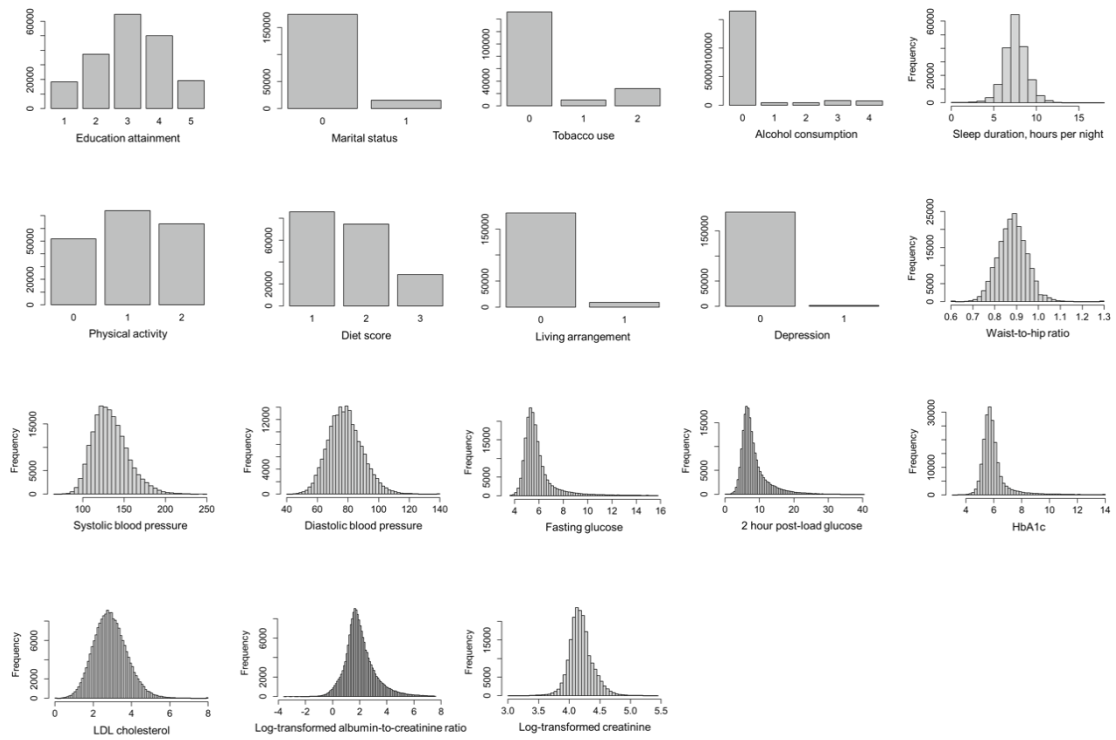

**Figure S7. Distributions of predictors after multiple imputations, showing the first imputed data set, related to STAR Methods.**



**Table S1. Multivariable-adjusted hazard ratios and 95% CIs for ischemic heart disease mortality in overall population and by gender using competing risk regression model, related to Table 3**

|                                                                                    | Overall           |                  | Women            |                  | Men             |                  | <i>P</i> interaction of women and men |
|------------------------------------------------------------------------------------|-------------------|------------------|------------------|------------------|-----------------|------------------|---------------------------------------|
|                                                                                    | Case/N (%)        | HR (95%CI)       | Case/N (%)       | HR (95%CI)       | Case/N (%)      | HR (95%CI)       |                                       |
| <b>Social determinants</b>                                                         |                   |                  |                  |                  |                 |                  |                                       |
| <b>Educational attainment</b>                                                      |                   |                  |                  |                  |                 |                  | <.0001                                |
| High school or above                                                               | 230/63519 (0.4)   | 1.00 (Reference) | 51/38384 (0.1)   | 1.00 (Reference) | 179/25135 (0.7) | 1.00 (Reference) |                                       |
| Middle school                                                                      | 271/59786 (0.5)   | 1.02 (0.84-1.23) | 106/37742 (0.3)  | 1.53 (1.07-2.20) | 164/22044 (0.8) | 0.88 (0.70-1.10) |                                       |
| Primary school or less                                                             | 746/50699 (1.5)   | 1.43 (1.20-1.70) | 478/37311 (1.3)  | 2.19 (1.57-3.05) | 268/13388 (2.0) | 1.16 (0.93-1.45) |                                       |
| <b>Marital status</b>                                                              |                   |                  |                  |                  |                 |                  | 0.508                                 |
| Married                                                                            | 1042/160298 (0.7) | 1.00 (Reference) | 494/102038 (0.5) | 1.00 (Reference) | 549/58260 (0.9) | 1.00 (Reference) |                                       |
| Single, divorced, separated, or widowed                                            | 205/13706 (1.5)   | 1.11 (0.92-1.33) | 142/11399 (1.3)  | 0.99 (0.79-1.24) | 62/2307 (2.7)   | 1.32 (0.94-1.85) |                                       |
| <b>Living alone</b>                                                                |                   |                  |                  |                  |                 |                  | 0.595                                 |
| No                                                                                 | 1133/166267 (0.7) | 1.00 (Reference) | 563/107628 (0.5) | 1.00 (Reference) | 570/58639 (1.0) | 1.00 (Reference) |                                       |
| Yes                                                                                | 114/7737 (1.5)    | 1.14 (0.91-1.43) | 73/5809 (1.3)    | 1.07 (0.81-1.41) | 41/1928 (2.1)   | 1.22 (0.82-1.79) |                                       |
| <b>Moderate or severe depression</b>                                               |                   |                  |                  |                  |                 |                  | 0.305                                 |
| No                                                                                 | 1237/172458 (0.7) | 1.00 (Reference) | 629/112266 (0.6) | 1.00 (Reference) | 609/60192 (1.0) | 1.00 (Reference) |                                       |
| Yes                                                                                | 10/1546 (0.6)     | 1.10 (0.56-2.19) | 7/1171 (0.6)     | 1.54 (0.71-3.35) | 2/375 (0.6)     | 0.55 (0.13-2.30) |                                       |
| <b>Gross domestic product per capita (yuan)*</b>                                   |                   |                  |                  |                  |                 |                  | 0.008                                 |
| ≥ 36,262                                                                           | 584/117187 (0.5)  | 1.00 (Reference) | 279/76795 (0.4)  | 1.00 (Reference) | 305/40392 (0.8) | 1.00 (Reference) |                                       |
| < 36,262                                                                           | 663/56817 (1.2)   | 1.27 (1.10-1.46) | 357/36642 (1.0)  | 1.43 (1.18-1.73) | 306/20175 (1.5) | 1.14 (0.93-1.38) |                                       |
| <b>Ambient PM<sub>2.5</sub> air pollution (μg/m<sup>3</sup>)*</b>                  |                   |                  |                  |                  |                 |                  | 0.742                                 |
| < 59.11                                                                            | 519/124871 (0.4)  | 1.00 (Reference) | 262/81659 (0.3)  | 1.00 (Reference) | 257/43212 (0.6) | 1.00 (Reference) |                                       |
| ≥ 59.11                                                                            | 728/49133 (1.5)   | 2.37 (2.09-2.70) | 374/31778 (1.2)  | 2.13 (1.78-2.55) | 354/17355 (2.0) | 2.59 (2.16-3.11) |                                       |
| <b>Lifestyle Risk Factors</b>                                                      |                   |                  |                  |                  |                 |                  |                                       |
| <b>Tobacco use</b>                                                                 |                   |                  |                  |                  |                 |                  | 0.940                                 |
| Never                                                                              | 915/139201 (0.7)  | 1.00 (Reference) | 614/111225 (0.6) | 1.00 (Reference) | 301/27976 (1.1) | 1.00 (Reference) |                                       |
| Former                                                                             | 92/8192 (1.1)     | 1.15 (0.90-1.47) | 8/495 (1.5)      | 1.42 (0.65-3.09) | 84/7697 (1.1)   | 1.09 (0.84-1.41) |                                       |
| Current                                                                            | 240/26611 (0.9)   | 1.31 (1.10-1.57) | 14/1717 (0.8)    | 1.20 (0.70-2.06) | 225/24894 (0.9) | 1.29 (1.07-1.56) |                                       |
| <b>Alcohol consumption</b>                                                         |                   |                  |                  |                  |                 |                  | 0.344                                 |
| Never                                                                              | 1051/150967 (0.7) | 1.00 (Reference) | 618/110977 (0.6) | 1.00 (Reference) | 433/39990 (1.1) | 1.00 (Reference) |                                       |
| Former                                                                             | 60/3832 (1.6)     | 1.36 (1.01-1.83) | 6/484 (1.2)      | 1.57 (0.64-3.90) | 54/3348 (1.6)   | 1.34 (0.99-1.82) |                                       |
| Current: low                                                                       | 25/4223 (0.6)     | 0.63 (0.42-0.96) | 7/1026 (0.6)     | 1.09 (0.48-2.47) | 19/3197 (0.6)   | 0.54 (0.34-0.88) |                                       |
| Current: moderate                                                                  | 51/7718 (0.7)     | 0.65 (0.48-0.89) | 2/455 (0.6)      | 0.74 (0.19-2.91) | 49/7263 (0.7)   | 0.64 (0.47-0.88) |                                       |
| Current: high                                                                      | 60/7264 (0.8)     | 0.82 (0.61-1.09) | 3/495 (0.7)      | 0.88 (0.29-2.66) | 56/6769 (0.8)   | 0.83 (0.62-1.13) |                                       |
| <b>Diet score</b>                                                                  |                   |                  |                  |                  |                 |                  | 0.781                                 |
| 3 - 4                                                                              | 110/26744 (0.4)   | 1.00 (Reference) | 53/17060 (0.3)   | 1.00 (Reference) | 57/9684 (0.6)   | 1.00 (Reference) |                                       |
| 2                                                                                  | 392/68396 (0.6)   | 1.16 (0.93-1.46) | 200/44931 (0.4)  | 1.10 (0.80-1.52) | 192/23465 (0.8) | 1.22 (0.87-1.70) |                                       |
| 0 - 1                                                                              | 745/78864 (1.0)   | 1.45 (1.17-1.81) | 383/51446 (0.8)  | 1.29 (0.94-1.76) | 362/27418 (1.3) | 1.63 (1.21-2.19) |                                       |
| <b>Physical activity</b>                                                           |                   |                  |                  |                  |                 |                  | 0.498                                 |
| High                                                                               | 370/47177 (0.8)   | 1.00 (Reference) | 173/30718 (0.6)  | 1.00 (Reference) | 197/16459 (1.2) | 1.00 (Reference) |                                       |
| Moderate                                                                           | 403/67064 (0.6)   | 0.84 (0.72-0.97) | 216/44346 (0.5)  | 0.92 (0.74-1.13) | 187/22718 (0.8) | 0.76 (0.62-0.94) |                                       |
| Low                                                                                | 474/59763 (0.8)   | 1.01 (0.87-1.17) | 248/38373 (0.7)  | 1.03 (0.83-1.27) | 227/21390 (1.1) | 0.99 (0.81-1.22) |                                       |
| <b>Sleep duration (hours per night)</b>                                            |                   |                  |                  |                  |                 |                  | 0.057                                 |
| 6 - 8                                                                              | 573/105943 (0.5)  | 1.00 (Reference) | 277/69424 (0.4)  | 1.00 (Reference) | 297/36519 (0.8) | 1.00 (Reference) |                                       |
| < 6                                                                                | 45/8945 (0.5)     | 0.79 (0.52-1.19) | 23/5785 (0.4)    | 0.78 (0.45-1.35) | 22/3160 (0.7)   | 0.80 (0.46-1.38) |                                       |
| > 8                                                                                | 629/59116 (1.1)   | 1.14 (0.99-1.32) | 336/38228 (0.9)  | 1.17 (0.97-1.40) | 292/20888 (1.4) | 1.12 (0.91-1.38) |                                       |
| <b>Metabolic Risk Factors</b>                                                      |                   |                  |                  |                  |                 |                  |                                       |
| <b>Abdominal obesity</b>                                                           |                   |                  |                  |                  |                 |                  | 0.085                                 |
| No                                                                                 | 835/126976 (0.7)  | 1.00 (Reference) | 376/78811 (0.5)  | 1.00 (Reference) | 459/48165 (1.0) | 1.00 (Reference) |                                       |
| Yes                                                                                | 412/47028 (0.9)   | 1.05 (0.92-1.20) | 260/34626 (0.8)  | 0.94 (0.79-1.11) | 152/12402 (1.2) | 1.18 (0.97-1.44) |                                       |
| <b>Hypertension</b>                                                                |                   |                  |                  |                  |                 |                  | 0.006                                 |
| No                                                                                 | 346/97980 (0.4)   | 1.00 (Reference) | 156/66968 (0.2)  | 1.00 (Reference) | 190/31012 (0.6) | 1.00 (Reference) |                                       |
| Yes                                                                                | 901/76024 (1.2)   | 1.46 (1.28-1.67) | 480/46469 (1.0)  | 1.62 (1.32-1.97) | 421/29555 (1.4) | 1.30 (1.08-1.56) |                                       |
| <b>Diabetes</b>                                                                    |                   |                  |                  |                  |                 |                  | 0.816                                 |
| No                                                                                 | 760/133871 (0.6)  | 1.00 (Reference) | 385/88907 (0.4)  | 1.00 (Reference) | 375/44964 (0.8) | 1.00 (Reference) |                                       |
| Yes                                                                                | 487/40133 (1.2)   | 1.40 (1.24-1.58) | 251/24530 (1.0)  | 1.39 (1.17-1.64) | 236/15603 (1.5) | 1.39 (1.17-1.66) |                                       |
| <b>Low-density lipoprotein cholesterol (mmol/l)</b>                                |                   |                  |                  |                  |                 |                  | 0.353                                 |
| < 3.4                                                                              | 842/127247 (0.7)  | 1.00 (Reference) | 402/80717 (0.5)  | 1.00 (Reference) | 440/46530 (0.9) | 1.00 (Reference) |                                       |
| 3.4 - <4.9                                                                         | 362/43490 (0.8)   | 1.19 (1.05-1.35) | 209/30230 (0.7)  | 1.19 (1.01-1.42) | 153/13260 (1.2) | 1.19 (0.98-1.44) |                                       |
| ≥ 4.9                                                                              | 43/3267 (1.3)     | 1.81 (1.32-2.48) | 25/2490 (1.0)    | 1.50 (1.00-2.26) | 18/777 (2.3)    | 2.52 (1.55-4.09) |                                       |
| <b>Urine albumin-creatinine ratio (mg/g)</b>                                       |                   |                  |                  |                  |                 |                  | 0.045                                 |
| < 30                                                                               | 826/155501 (0.5)  | 1.00 (Reference) | 382/100742 (0.4) | 1.00 (Reference) | 444/54759 (0.8) | 1.00 (Reference) |                                       |
| 30 - <300                                                                          | 322/16320 (2.0)   | 1.87 (1.62-2.15) | 198/11288 (1.8)  | 2.00 (1.65-2.42) | 124/5032 (2.5)  | 1.67 (1.34-2.08) |                                       |
| ≥ 300                                                                              | 99/2183 (4.5)     | 3.23 (2.55-4.08) | 56/1407 (4.0)    | 3.32 (2.43-4.54) | 43/776 (5.5)    | 3.05 (2.12-4.37) |                                       |
| <b>Estimated glomerular filtration rate &lt; 60 (ml/min per 1.73m<sup>2</sup>)</b> |                   |                  |                  |                  |                 |                  | 0.834                                 |
| No                                                                                 | 1125/170897 (0.7) | 1.00 (Reference) | 577/111600 (0.5) | 1.00 (Reference) | 549/59297 (0.9) | 1.00 (Reference) |                                       |
| Yes                                                                                | 122/3107 (3.9)    | 1.45 (1.17-1.79) | 59/1837 (3.2)    | 1.38 (1.03-1.86) | 62/1270 (4.9)   | 1.54 (1.14-2.08) |                                       |

For the 15 individual-level risk factors (excluding gross domestic product per capita and ambient PM<sub>2.5</sub> air pollution), each model was adjusted for age, sex, region (urban or rural), and all other individual-level risk factors. For the two community-level risk factors of gross domestic product per capita and ambient PM<sub>2.5</sub> air pollution, a separate model was employed with adjustment for age, sex, region (urban or rural) and the remaining 15 individual-level risk factors.

**Table S2. Multivariable-adjusted hazard ratios and 95% CIs for stroke mortality in overall population and by gender using competing risk regression model, related to Table 3**

|                                                                                    | Case/N (%)        | Overall          | Case/N (%)       | Women            | Case/N (%)      | Men              | P interaction of women and men |
|------------------------------------------------------------------------------------|-------------------|------------------|------------------|------------------|-----------------|------------------|--------------------------------|
|                                                                                    |                   | HR (95%CI)       |                  | HR (95%CI)       |                 | HR (95%CI)       |                                |
| <b>Social determinants</b>                                                         |                   |                  |                  |                  |                 |                  |                                |
| <b>Educational attainment</b>                                                      |                   |                  |                  |                  |                 |                  |                                |
| High school or above                                                               | 239/63519 (0.4)   | 1.00 (Reference) | 76/38384 (0.2)   | 1.00 (Reference) | 163/25135 (0.7) | 1.00 (Reference) | 0.330                          |
| Middle school                                                                      | 345/59786 (0.6)   | 1.28 (1.08-1.52) | 127/37742 (0.3)  | 1.26 (0.94-1.68) | 218/22044 (1.0) | 1.31 (1.06-1.62) |                                |
| Primary school or less                                                             | 771/50699 (1.5)   | 1.69 (1.43-2.00) | 445/37311 (1.2)  | 1.67 (1.27-2.19) | 326/13388 (2.4) | 1.70 (1.36-2.11) |                                |
| <b>Marital status</b>                                                              |                   |                  |                  |                  |                 |                  |                                |
| Married                                                                            | 1159/160298 (0.7) | 1.00 (Reference) | 518/102038 (0.5) | 1.00 (Reference) | 641/58260 (1.1) | 1.00 (Reference) | 0.239                          |
| Single, divorced, separated, or widowed                                            | 196/13706 (1.4)   | 1.08 (0.90-1.30) | 130/11399 (1.1)  | 0.99 (0.79-1.23) | 66/2307 (2.9)   | 1.25 (0.89-1.76) |                                |
| <b>Living alone</b>                                                                |                   |                  |                  |                  |                 |                  |                                |
| No                                                                                 | 1246/166267 (0.8) | 1.00 (Reference) | 584/107628 (0.5) | 1.00 (Reference) | 662/58639 (1.1) | 1.00 (Reference) | 0.291                          |
| Yes                                                                                | 109/7737 (1.4)    | 1.11 (0.88-1.39) | 64/5809 (1.1)    | 1.01 (0.76-1.35) | 45/1928 (2.4)   | 1.20 (0.80-1.79) |                                |
| <b>Moderate or severe depression</b>                                               |                   |                  |                  |                  |                 |                  |                                |
| No                                                                                 | 1345/172458 (0.8) | 1.00 (Reference) | 644/112266 (0.6) | 1.00 (Reference) | 701/60192 (1.2) | 1.00 (Reference) | 0.308                          |
| Yes                                                                                | 10/1546 (0.7)     | 1.12 (0.55-2.27) | 4/1171 (0.4)     | 0.84 (0.31-2.26) | 6/375 (1.5)     | 1.49 (0.58-3.83) |                                |
| <b>Gross domestic product per capita (yuan)*</b>                                   |                   |                  |                  |                  |                 |                  |                                |
| ≥ 36,262                                                                           | 708/117187 (0.6)  | 1.00 (Reference) | 336/76795 (0.4)  | 1.00 (Reference) | 372/40392 (0.9) | 1.00 (Reference) | 0.277                          |
| < 36,262                                                                           | 647/56817 (1.1)   | 1.29 (1.14-1.46) | 312/36642 (0.9)  | 1.34 (1.13-1.59) | 335/20175 (1.7) | 1.25 (1.05-1.50) |                                |
| <b>Ambient PM<sub>2.5</sub> air pollution (µg/m<sup>3</sup>)*</b>                  |                   |                  |                  |                  |                 |                  |                                |
| < 59.11                                                                            | 746/124871 (0.6)  | 1.00 (Reference) | 353/81659 (0.4)  | 1.00 (Reference) | 393/43212 (0.9) | 1.00 (Reference) | 0.455                          |
| ≥ 59.11                                                                            | 609/49133 (1.2)   | 1.34 (1.19-1.52) | 295/31778 (0.9)  | 1.32 (1.11-1.56) | 314/17355 (1.8) | 1.36 (1.14-1.62) |                                |
| <b>Lifestyle Risk Factors</b>                                                      |                   |                  |                  |                  |                 |                  |                                |
| <b>Tobacco use</b>                                                                 |                   |                  |                  |                  |                 |                  |                                |
| Never                                                                              | 1004/139201 (0.7) | 1.00 (Reference) | 624/111225 (0.6) | 1.00 (Reference) | 380/27976 (1.4) | 1.00 (Reference) | 0.037                          |
| Former                                                                             | 90/8192 (1.1)     | 0.86 (0.68-1.09) | 5/495 (1.1)      | 1.10 (0.46-2.62) | 85/7697 (1.1)   | 0.81 (0.63-1.03) |                                |
| Current                                                                            | 261/26611 (1.0)   | 1.04 (0.88-1.24) | 19/1717 (1.1)    | 1.67 (1.04-2.68) | 242/24894 (1.0) | 0.96 (0.80-1.15) |                                |
| <b>Alcohol consumption</b>                                                         |                   |                  |                  |                  |                 |                  |                                |
| Never                                                                              | 1100/150967 (0.7) | 1.00 (Reference) | 633/110977 (0.6) | 1.00 (Reference) | 467/39990 (1.2) | 1.00 (Reference) | 0.533                          |
| Former                                                                             | 57/3832 (1.5)     | 1.28 (0.96-1.70) | 2/484 (0.3)      | 0.43 (0.06-2.88) | 56/3348 (1.7)   | 1.37 (1.03-1.83) |                                |
| Current: low                                                                       | 32/4223 (0.8)     | 0.78 (0.54-1.14) | 4/1026 (0.4)     | 0.71 (0.27-1.87) | 27/3197 (0.9)   | 0.81 (0.54-1.21) |                                |
| Current: moderate                                                                  | 73/7718 (0.9)     | 0.90 (0.69-1.17) | 2/455 (0.5)      | 0.71 (0.18-2.84) | 70/7263 (1.0)   | 0.92 (0.70-1.21) |                                |
| Current: high                                                                      | 93/7264 (1.3)     | 1.20 (0.94-1.53) | 7/495 (1.4)      | 1.86 (0.86-3.99) | 86/6769 (1.3)   | 1.20 (0.93-1.55) |                                |
| <b>Diet score</b>                                                                  |                   |                  |                  |                  |                 |                  |                                |
| 3 - 4                                                                              | 123/26744 (0.5)   | 1.00 (Reference) | 54/17060 (0.3)   | 1.00 (Reference) | 69/9684 (0.7)   | 1.00 (Reference) | 0.702                          |
| 2                                                                                  | 457/68396 (0.7)   | 1.23 (0.99-1.52) | 224/44931 (0.5)  | 1.26 (0.91-1.73) | 234/23465 (1.0) | 1.20 (0.90-1.60) |                                |
| 0 - 1                                                                              | 775/78864 (1.0)   | 1.40 (1.14-1.71) | 370/51446 (0.7)  | 1.36 (1.00-1.84) | 404/27418 (1.5) | 1.44 (1.08-1.91) |                                |
| <b>Physical activity</b>                                                           |                   |                  |                  |                  |                 |                  |                                |
| High                                                                               | 369/47177 (0.8)   | 1.00 (Reference) | 172/30718 (0.6)  | 1.00 (Reference) | 196/16459 (1.2) | 1.00 (Reference) | 0.255                          |
| Moderate                                                                           | 478/67064 (0.7)   | 1.01 (0.88-1.16) | 241/44346 (0.5)  | 1.01 (0.83-1.24) | 236/22718 (1.0) | 1.00 (0.82-1.22) |                                |
| Low                                                                                | 508/59763 (0.9)   | 1.12 (0.96-1.30) | 234/38373 (0.6)  | 1.02 (0.82-1.26) | 274/21390 (1.3) | 1.21 (0.99-1.49) |                                |
| <b>Sleep duration (hours per night)</b>                                            |                   |                  |                  |                  |                 |                  |                                |
| 6 - 8                                                                              | 623/105943 (0.6)  | 1.00 (Reference) | 296/69424 (0.4)  | 1.00 (Reference) | 327/36519 (0.9) | 1.00 (Reference) | 0.563                          |
| < 6                                                                                | 50/8945 (0.6)     | 0.78 (0.55-1.11) | 22/5785 (0.4)    | 0.69 (0.39-1.20) | 28/3160 (0.9)   | 0.87 (0.56-1.35) |                                |
| > 8                                                                                | 682/59116 (1.2)   | 1.24 (1.09-1.40) | 330/38228 (0.9)  | 1.23 (1.03-1.47) | 352/20888 (1.7) | 1.24 (1.05-1.46) |                                |
| <b>Metabolic Risk Factors</b>                                                      |                   |                  |                  |                  |                 |                  |                                |
| <b>Abdominal obesity</b>                                                           |                   |                  |                  |                  |                 |                  |                                |
| No                                                                                 | 919/126977 (0.7)  | 1.00 (Reference) | 369/78811 (0.5)  | 1.00 (Reference) | 550/48165 (1.1) | 1.00 (Reference) | 0.706                          |
| Yes                                                                                | 436/47027 (0.9)   | 1.04 (0.92-1.17) | 279/34626 (0.8)  | 1.05 (0.89-1.24) | 157/12402 (1.3) | 1.00 (0.83-1.20) |                                |
| <b>Hypertension</b>                                                                |                   |                  |                  |                  |                 |                  |                                |
| No                                                                                 | 333/97980 (0.3)   | 1.00 (Reference) | 152/66968 (0.2)  | 1.00 (Reference) | 180/31012 (0.6) | 1.00 (Reference) | 0.152                          |
| Yes                                                                                | 1022/76024 (1.3)  | 1.93 (1.69-2.21) | 496/46469 (1.1)  | 2.02 (1.65-2.46) | 527/29555 (1.8) | 1.84 (1.53-2.21) |                                |
| <b>Diabetes</b>                                                                    |                   |                  |                  |                  |                 |                  |                                |
| No                                                                                 | 821/133871 (0.6)  | 1.00 (Reference) | 384/88907 (0.4)  | 1.00 (Reference) | 437/44964 (1.0) | 1.00 (Reference) | 0.758                          |
| Yes                                                                                | 534/40133 (1.3)   | 1.47 (1.31-1.65) | 264/24530 (1.1)  | 1.48 (1.25-1.75) | 270/15603 (1.7) | 1.46 (1.24-1.71) |                                |
| <b>Low-density lipoprotein cholesterol (mmol/l)</b>                                |                   |                  |                  |                  |                 |                  |                                |
| < 3.4                                                                              | 984/127247 (0.8)  | 1.00 (Reference) | 440/80717 (0.5)  | 1.00 (Reference) | 545/46530 (1.2) | 1.00 (Reference) | 0.644                          |
| 3.4 - <4.9                                                                         | 335/43490 (0.8)   | 0.94 (0.82-1.06) | 188/30230 (0.6)  | 0.95 (0.80-1.13) | 146/13260 (1.1) | 0.91 (0.76-1.10) |                                |
| ≥ 4.9                                                                              | 36/3267 (1.1)     | 1.30 (0.93-1.82) | 20/2490 (0.8)    | 1.04 (0.67-1.63) | 16/777 (2.1)    | 1.87 (1.12-3.13) |                                |
| <b>Urine albumin-creatinine ratio (mg/g)</b>                                       |                   |                  |                  |                  |                 |                  |                                |
| < 30                                                                               | 972/155501 (0.6)  | 1.00 (Reference) | 426/100742 (0.4) | 1.00 (Reference) | 546/54759 (1.0) | 1.00 (Reference) | 0.056                          |
| 30 - <300                                                                          | 301/16320 (1.8)   | 1.51 (1.31-1.73) | 177/11288 (1.6)  | 1.69 (1.39-2.06) | 124/5032 (2.5)  | 1.30 (1.05-1.60) |                                |
| ≥ 300                                                                              | 82/2183 (3.8)     | 2.34 (1.82-3.01) | 45/1407 (3.2)    | 2.50 (1.77-3.51) | 37/776 (4.8)    | 2.16 (1.48-3.15) |                                |
| <b>Estimated glomerular filtration rate &lt; 60 (ml/min per 1.73m<sup>2</sup>)</b> |                   |                  |                  |                  |                 |                  |                                |
| No                                                                                 | 1247/170897 (0.7) | 1.00 (Reference) | 599/111600 (0.5) | 1.00 (Reference) | 648/59297 (1.1) | 1.00 (Reference) | 0.973                          |
| Yes                                                                                | 108/3107 (3.5)    | 1.33 (1.07-1.65) | 49/1837 (2.7)    | 1.26 (0.92-1.72) | 59/1270 (4.7)   | 1.41 (1.05-1.90) |                                |

For the 15 individual-level risk factors (excluding gross domestic product per capita and ambient PM<sub>2.5</sub> air pollution), each model was adjusted for age, sex, region (urban or rural), and all other individual-level risk factors. For the two community-level risk factors of gross domestic product per capita and ambient PM<sub>2.5</sub> air pollution, a separate model was employed with adjustment for age, sex, region (urban or rural) and the remaining 15 individual-level risk factors.

**Table S3. Population attributable fractions for all-cause and cause-specific mortalities associated with low gross domestic product per capita and high ambient PM<sub>2.5</sub> air pollution, related to Figure 1-3.**

|                                              | All-cause mortality | Cardiovascular mortality | Ischemic heart disease mortality | Stroke mortality     | Cancer mortality     |
|----------------------------------------------|---------------------|--------------------------|----------------------------------|----------------------|----------------------|
| Total population                             |                     |                          |                                  |                      |                      |
| Low gross domestic product per capita        | 7.8% (6.1% - 9.7%)  | 13.3% (10.3% - 16.4%)    | 8.9% (3.8% - 14.1%)              | 9.2% (4.7% - 14.1%)  | 8.7% (5.8% - 11.6%)  |
| High ambient PM <sub>2.5</sub> air pollution | 4.3% (3.0% - 5.8%)  | 13.4% (10.8% - 16.1%)    | 28.3% (23.7% - 32.9%)            | 9.7% (5.6% - 13.6%)  | 2.2% (0.0% - 4.6%)   |
| Women                                        |                     |                          |                                  |                      |                      |
| Low gross domestic product per capita        | 8.3% (5.8% - 10.9%) | 16.2% (11.9% - 20.7%)    | 13.2% (6.1% - 20.5%)             | 10.4% (3.7% - 17.6%) | 6.4% (2.2% - 10.7%)  |
| High ambient PM <sub>2.5</sub> air pollution | 3.5% (1.4% - 5.6%)  | 11.4% (7.7% - 15.2%)     | 24.5% (17.9% - 31.2%)            | 8.9% (3.3% - 14.8%)  | -0.6% (-3.8% - 3.0%) |
| Men                                          |                     |                          |                                  |                      |                      |
| Low gross domestic product per capita        | 7.7% (5.1% - 10.2%) | 10.2% (6.2% - 14.8%)     | 5.1% (-2.0% - 12.3%)             | 8.2% (1.6% - 15.0%)  | 10.7% (6.8% - 14.8%) |
| High ambient PM <sub>2.5</sub> air pollution | 5.2% (3.1% - 7.2%)  | 15.3% (11.4% - 19.1%)    | 31.7% (25.1% - 38.3%)            | 10.3% (4.7% - 16.1%) | 4.7% (1.4% - 7.9%)   |

Notes: The PAFs were calculated using the aforementioned formula:  $PAF = p(HR-1) / (1 + p(HR-1))$ , where p is the population prevalence of the risk factor.

**Table S4. Multivariable-adjusted hazard ratios and 95% confidence intervals of alcohol consumption with all-cause and cause-specific mortalities, related to Table 2-4.**

| <b>Alcohol consumption category</b>                    | <b>All-cause mortality</b> | <b>Cardiovascular mortality</b> | <b>Ischemic heart disease mortality</b> | <b>Stroke mortality</b> | <b>Cancer mortality</b> |
|--------------------------------------------------------|----------------------------|---------------------------------|-----------------------------------------|-------------------------|-------------------------|
| Never                                                  | 1.00 (Reference)           | 1.00 (Reference)                | 1.00 (Reference)                        | 1.00 (Reference)        | 1.00 (Reference)        |
| Former                                                 | 1.16 (1.04 – 1.30)         | 1.25 (1.04 – 1.50)              | 1.34 (1.00 – 1.79)                      | 1.27 (0.95 – 1.70)      | 1.11 (0.92 – 1.34)      |
| Current: low                                           | 0.85 (0.74 – 0.96)         | 0.76 (0.61 – 0.96)              | 0.62 (0.41 – 0.93)                      | 0.77 (0.53 – 1.11)      | 0.94 (0.77 – 1.15)      |
| Current: moderate                                      | 0.87 (0.79 – 0.96)         | 0.72 (0.61 – 0.86)              | 0.65 (0.48 – 0.88)                      | 0.89 (0.69 – 1.16)      | 1.07 (0.93 – 1.23)      |
| Current: high but not binge drinking*                  | 0.97 (0.86 – 1.10)         | 0.91 (0.73 – 1.13)              | 0.73 (0.50 – 1.06)                      | 1.14 (0.85 – 1.54)      | 1.06 (0.88 – 1.28)      |
| Current: high and binge drinking at least once a year* | 1.21 (1.06 – 1.39)         | 1.09 (0.86 – 1.39)              | 0.96 (0.63 – 1.46)                      | 1.32 (0.93 – 1.87)      | 1.40 (1.15 – 1.71)      |

Notes: \*At the baseline of our cohort, we had asked the participants “How many times have you experienced binge drinking in the past year?” Based on their responses to this item, we further categorized the subjects with current high alcohol consumption into two groups: current: high and not experiencing binge drinking, and current: high and experiencing binge drinking at least once a year.



**Table S5. Summary of Risk Factors: Definitions, Measurement Methods, and Categorizations for the Calculation of Population Attributable Fractions (PAFs), related to STAR Methods**

| Risk Factor                                                        | Measurement and definition                                                                                                                                                                                                                                                                                                                                                                                                                                                                                                                                                                                                                                                                                                                                                                                 | Risk category                                                                                                         | Reference category                                                           |
|--------------------------------------------------------------------|------------------------------------------------------------------------------------------------------------------------------------------------------------------------------------------------------------------------------------------------------------------------------------------------------------------------------------------------------------------------------------------------------------------------------------------------------------------------------------------------------------------------------------------------------------------------------------------------------------------------------------------------------------------------------------------------------------------------------------------------------------------------------------------------------------|-----------------------------------------------------------------------------------------------------------------------|------------------------------------------------------------------------------|
| <b>Social determinants</b>                                         |                                                                                                                                                                                                                                                                                                                                                                                                                                                                                                                                                                                                                                                                                                                                                                                                            |                                                                                                                       |                                                                              |
| <b>Individual Level</b>                                            |                                                                                                                                                                                                                                                                                                                                                                                                                                                                                                                                                                                                                                                                                                                                                                                                            |                                                                                                                       |                                                                              |
| Educational attainment                                             | Education was self-reported, and classified into three groups: primary school or less, middle school education, or high school or above).                                                                                                                                                                                                                                                                                                                                                                                                                                                                                                                                                                                                                                                                  | Low educational attainment (primary school or less, middle school education)                                          | High school or above                                                         |
| Marital status                                                     | Marital status was self-reported and categorized as married or having a partner; single, divorced, separated, or widowed.                                                                                                                                                                                                                                                                                                                                                                                                                                                                                                                                                                                                                                                                                  | Single, divorced, separated, or widowed                                                                               | Married or having a partner                                                  |
| Living arrangements                                                | Living arrangements were self-reported and categorized as living with children and/or a spouse; or living alone.                                                                                                                                                                                                                                                                                                                                                                                                                                                                                                                                                                                                                                                                                           | Living alone                                                                                                          | Living with children and/or a spouse                                         |
| Depression                                                         | Depression was assessed with the self-reported Patient Health Questionnaire 9 (PHQ-9). The PHQ-9 consists of nine items based on the Diagnostic and Statistical Manual of Mental Disorders, 4 <sup>th</sup> edition (DSM-IV). Participants were asked how often they had been bothered by nine psychiatric symptoms over the past 2 weeks. Each of the nine items is scored as 0, 1, 2, or 3, which represents symptom severity of 'not at all', 'several days', 'more than half the days', or 'nearly every day', respectively. The nine items are summed to give the PHQ-9 total score. A score of $\geq 10$ represents moderate or severe depression. <sup>1</sup>                                                                                                                                      | Moderate or severe depression (PHQ-9 score $\geq 10$ )                                                                | PHQ-9 score $< 10$                                                           |
| <b>Community level</b>                                             |                                                                                                                                                                                                                                                                                                                                                                                                                                                                                                                                                                                                                                                                                                                                                                                                            |                                                                                                                       |                                                                              |
| Gross domestic product per capita                                  | Gross domestic product per capita was retrieved from the Statistical Report on the National Economy and Social Development for each city in 2011. Participants were categorized into two groups using a cut-off value equal to the average gross domestic product per capita in China in 2011 (5614.4 US\$, 36,262 Chinese Yuan [CNY]) according to World Bank data. <sup>2</sup>                                                                                                                                                                                                                                                                                                                                                                                                                          | Low gross domestic product per capita ( $< 5614.4$ US\$)                                                              | $\geq 5614.4$ US\$                                                           |
| Ambient fine particulate matter (PM <sub>2.5</sub> ) air pollution | Data on the annual average residential PM <sub>2.5</sub> exposure in 2011 for each city were collected from the Global Annual PM <sub>2.5</sub> Grids, <sup>3</sup> which combines AOD retrievals from multiple satellite algorithms including the NASA MODerate resolution Imaging Spectroradiometer Collection 6.1 (MODIS C6.1), Multi-angle Imaging SpectroRadiometer Version 23 (MISRv23), MODIS Multi-Angle Implementation of Atmospheric Correction Collection 6 (MAIAC C6), and the Sea-Viewing Wide Field-of-View Sensor (SeaWiFS) Deep Blue Version 4. Participants were categorized into two groups using a cut-off value equal to the upper quartile of PM <sub>2.5</sub> levels in our study (59.11 $\mu\text{g}/\text{m}^3$ ) according to World Health Organization [WHO] data. <sup>4</sup> | High PM <sub>2.5</sub> ( $> 59.11$ $\mu\text{g}/\text{m}^3$ )                                                         | $\leq 59.11$ $\mu\text{g}/\text{m}^3$                                        |
| <b>Lifestyle factors</b>                                           |                                                                                                                                                                                                                                                                                                                                                                                                                                                                                                                                                                                                                                                                                                                                                                                                            |                                                                                                                       |                                                                              |
| Tobacco use                                                        | Self-reported tobacco use using a standard tobacco use frequency questionnaire, categorized as never, former, or current.<br>Never: never smoked or had not smoked cigarettes regularly ( $< 100$ cigarettes in a lifetime).<br>Former: not currently smoking cigarettes but had smoked at least 7 cigarettes/week for at least 6 months in a lifetime.<br>Current: smoke every day or almost every day, with at least 7 cigarettes/week for at least 6 months.                                                                                                                                                                                                                                                                                                                                            | Current or former tobacco use                                                                                         | Never tobacco use                                                            |
| Alcohol consumption                                                | Self-reported alcohol consumption using a standard alcohol consumption frequency questionnaire, categorized as never, former, or current.<br>Never: never consumed alcohol.<br>Former: not currently but had consumed alcohol once per week regularly for at least 6 months in a lifetime.<br>Current: consumed alcohol once per week regularly during the past 6 months.<br>Current drinkers' alcohol consumption was further classified as low ( $\leq 7$ drinks/week), moderate (8-21 drinks/week for men and 8-14 drinks/week for women), or high ( $> 21$ drinks/week for men and $> 14$ drinks/week for women).                                                                                                                                                                                      | Heavy alcohol consumption (Former, or high current consumption)                                                       | Never, or low or moderate current consumption                                |
| Diet score                                                         | Diet score was calculated according to recommendations from the American Heart Association, though whole grain consumption was replaced with bean consumption. <sup>5,6</sup> It was calculated as the sum of each of the following components: fruits and vegetables $\geq 4.5$ cups/day (1 point); fish $\geq 198$ g/week (1 point); sweets/sugar-sweetened beverages $\leq 450$ kcal/week (1 point); and soy protein $\geq 25$ g/day (1 point). Diet score was categorized into poor (0-1), intermediate (2), or healthy (3-4).                                                                                                                                                                                                                                                                         | Unhealthy diet (Diet score: 0-2)                                                                                      | Diet score: 3-4                                                              |
| Physical activity                                                  | Physical activity was evaluated using the International Physical Activity Questionnaire, <sup>7</sup> and categorized as low ( $< 600$ metabolic equivalents [MET] $\times$ minutes per week or $< 150$ minutes per week of moderate intensity physical activity), moderate (600-3,000 MET $\times$ minutes or 150-750 minutes per week) or high ( $> 3000$ MET $\times$ minutes or $> 750$ minutes per week). <sup>8,9</sup>                                                                                                                                                                                                                                                                                                                                                                              | Low physical activity                                                                                                 | Moderate or high physical activity                                           |
| Sleep duration                                                     | Sleep duration was self-reported with standardized questions and defined as the interval between evening bedtime and morning wake-up time. It was categorized into three groups ( $< 6$ hours/night, 6-8 hours/night, and $> 8$ hours/night). <sup>10-12</sup>                                                                                                                                                                                                                                                                                                                                                                                                                                                                                                                                             | Long sleep duration ( $> 8$ hours/night)                                                                              | Sleep duration $\leq 8$ hours/night                                          |
| <b>Metabolic risk factors</b>                                      |                                                                                                                                                                                                                                                                                                                                                                                                                                                                                                                                                                                                                                                                                                                                                                                                            |                                                                                                                       |                                                                              |
| Abdominal obesity                                                  | Waist and hip circumference were measured and used to calculate the waist-to-hip ratio (WHR). Abdominal obesity was defined as WHR $\geq 0.95$ for men and $\geq 0.90$ for women. <sup>13</sup>                                                                                                                                                                                                                                                                                                                                                                                                                                                                                                                                                                                                            | Abdominal obesity (WHR $\geq 0.95$ in men and $\geq 0.90$ in women)                                                   | WHR $< 0.95$ in men and $< 0.90$ in women                                    |
| Hypertension                                                       | Three blood pressure measurements were obtained with participants in a seated position after five minutes of quiet rest using an automated electronic device (OMRON Model HEM-752 FUZZY, Dalian, China). Hypertension was defined as a systolic blood pressure $\geq 140$ mmHg or diastolic blood pressure $\geq 90$ mmHg using the mean of three readings; or treatment with antihypertensive medications.                                                                                                                                                                                                                                                                                                                                                                                                | Definition of hypertension met                                                                                        | Definition of hypertension not met                                           |
| Diabetes                                                           | Fasting and 2-hour postload glucose levels were measured using a glucose oxidase or hexokinase method. Hemoglobin A1c was measured using high-performance liquid chromatography (VARIANT II System, Bio-Rad Laboratories, CA, USA). Diabetes was defined as fasting glucose $\geq 7.0$ mmol/L or 2-hour postload glucose $\geq 11.1$ mmol/L; hemoglobin A1c $\geq 48$ mmol/mol (6.5%); self-reported history of diabetes. <sup>14</sup>                                                                                                                                                                                                                                                                                                                                                                    | Definition of diabetes met                                                                                            | Definition of diabetes not met                                               |
| Low-density lipoprotein cholesterol (LDL-C)                        | Serum fasting LDL-C was measured using an auto-analyzer (ARCHITECT ci16200 analyzer, Abbott Laboratories, Illinois, USA). LDL-C was divided into three subgroups: $< 3.4$ mmol/L ( $< 130$ mg/dL), $\geq 3.4$ and $< 4.9$ mmol/L (130-190 mg/dL), and $\geq 4.9$ mmol/L ( $\geq 190$ mg/dL). <sup>15-16</sup>                                                                                                                                                                                                                                                                                                                                                                                                                                                                                              | High LDL-C (LDL-C $\geq 3.4$ mmol/L [130 mg/dL])                                                                      | LDL-C $< 3.4$ mmol/L (130 mg/dL)                                             |
| Albuminuria                                                        | Urinary albumin concentration was measured by immunonephelometry using Siemens BNII and BN ProSpec nephelometers (Siemens Healthcare Diagnostics, Marburg, Germany). Urinary creatinine was determined by an enzymatic method (ADVIA Chemistry XPT System; Siemens Healthcare, Erlangen, Germany). Urine albumin-creatinine ratio was calculated. Albuminuria was defined as microalbuminuria (urine albumin-creatinine ratio: 30-299 mg/g) or macroalbuminuria (urine albumin-creatinine ratio $\geq 300$ mg/g). <sup>17</sup>                                                                                                                                                                                                                                                                            | Albuminuria (Urine albumin-creatinine ratio $\geq 30$ mg/g)                                                           | Urine albumin-creatinine ratio $< 30$ mg/g                                   |
| Low estimated glomerular filtration rate                           | Serum fasting creatinine was measured using an auto-analyzer (ARCHITECT ci16200 analyzer, Abbott Laboratories, Illinois, USA). Estimated glomerular filtration rate was calculated using the Chronic Kidney Disease-Epidemiology Collaboration equation. <sup>18</sup>                                                                                                                                                                                                                                                                                                                                                                                                                                                                                                                                     | Low estimated glomerular filtration rate (estimated glomerular filtration rate $< 60$ ml/min per 1.73m <sup>2</sup> ) | Estimated glomerular filtration rate $\geq 60$ ml/min per 1.73m <sup>2</sup> |

**Table S6. Spearman correlation coefficients across risk factors, related to STAR Methods**

|      | Spearman correlation coefficients |       |       |       |       |       |       |       |       |       |       |       |       |       |       |       |       |
|------|-----------------------------------|-------|-------|-------|-------|-------|-------|-------|-------|-------|-------|-------|-------|-------|-------|-------|-------|
|      | RF1                               | RF2   | RF3   | RF4   | RF5   | RF6   | RF7   | RF8   | RF9   | RF10  | RF11  | RF12  | RF13  | RF14  | RF15  | RF16  | RF17  |
| RF1  | 1.00                              | 0.32  | -0.01 | 0.03  | 0.01  | -0.06 | 0.02  | 0.02  | -0.04 | -0.01 | <0.01 | -0.02 | -0.01 | -0.06 | -0.02 | <0.01 | -0.02 |
| RF2  | 0.32                              | 1.00  | -0.01 | 0.03  | 0.01  | -0.02 | 0.06  | 0.02  | -0.02 | 0.01  | <0.01 | 0.04  | 0.01  | -0.03 | -0.01 | <0.01 | <0.01 |
| RF3  | -0.01                             | -0.01 | 1.00  | 0.05  | 0.07  | 0.01  | 0.03  | 0.01  | -0.01 | 0.04  | 0.01  | -0.05 | 0.07  | 0.02  | 0.01  | <0.01 | 0.11  |
| RF4  | 0.03                              | 0.03  | 0.05  | 1.00  | 0.11  | -0.01 | -0.02 | -0.05 | -0.03 | 0.02  | -0.01 | 0.08  | 0.11  | -0.03 | -0.03 | <0.01 | -0.01 |
| RF5  | 0.01                              | 0.01  | 0.07  | 0.11  | 1.00  | -0.01 | 0.05  | -0.01 | <0.01 | 0.07  | 0.02  | 0.09  | 0.16  | -0.02 | -0.01 | -0.02 | 0.06  |
| RF6  | -0.06                             | -0.02 | 0.01  | -0.01 | -0.01 | 1.00  | 0.11  | 0.14  | 0.06  | 0.07  | 0.04  | -0.01 | 0.07  | 0.05  | 0.02  | 0.01  | 0.02  |
| RF7  | 0.02                              | 0.06  | 0.03  | -0.02 | 0.05  | 0.11  | 1.00  | 0.16  | 0.07  | 0.18  | 0.07  | 0.10  | 0.10  | 0.02  | 0.01  | -0.01 | 0.07  |
| RF8  | 0.02                              | 0.02  | 0.01  | -0.05 | -0.01 | 0.14  | 0.16  | 1.00  | 0.06  | 0.12  | 0.06  | <0.01 | 0.02  | 0.02  | 0.02  | 0.01  | 0.03  |
| RF9  | -0.04                             | -0.02 | -0.01 | -0.03 | <0.01 | 0.06  | 0.07  | 0.06  | 1.00  | 0.03  | 0.02  | 0.03  | -0.01 | 0.02  | 0.01  | <0.01 | 0.07  |
| RF10 | -0.01                             | 0.01  | 0.04  | 0.02  | 0.07  | 0.07  | 0.18  | 0.12  | 0.03  | 1.00  | 0.12  | 0.04  | 0.08  | 0.03  | 0.02  | <0.01 | 0.06  |
| RF11 | <0.01                             | <0.01 | 0.01  | -0.01 | 0.02  | 0.04  | 0.07  | 0.06  | 0.02  | 0.12  | 1.00  | -0.02 | 0.02  | 0.04  | 0.02  | <0.01 | -0.03 |
| RF12 | -0.02                             | 0.04  | -0.05 | 0.08  | 0.09  | -0.01 | 0.10  | <0.01 | 0.03  | 0.04  | -0.02 | 1.00  | 0.07  | -0.04 | -0.01 | <0.01 | 0.28  |
| RF13 | -0.01                             | 0.01  | 0.07  | 0.11  | 0.16  | 0.07  | 0.10  | 0.02  | -0.01 | 0.08  | 0.02  | 0.07  | 1.00  | 0.03  | 0.01  | -0.02 | 0.03  |
| RF14 | -0.06                             | -0.03 | 0.02  | -0.03 | -0.02 | 0.05  | 0.02  | 0.02  | 0.02  | 0.03  | 0.04  | -0.04 | 0.03  | 1.00  | 0.50  | 0.03  | -0.02 |
| RF15 | -0.02                             | -0.01 | 0.01  | -0.03 | -0.01 | 0.02  | 0.01  | 0.02  | 0.01  | 0.02  | 0.02  | -0.01 | 0.01  | 0.50  | 1.00  | 0.04  | -0.03 |
| RF16 | <0.01                             | <0.01 | <0.01 | <0.01 | -0.02 | 0.01  | -0.01 | 0.01  | <0.01 | <0.01 | <0.01 | <0.01 | -0.02 | 0.03  | 0.04  | 1.00  | -0.02 |
| RF17 | -0.02                             | <0.01 | 0.11  | -0.01 | 0.06  | 0.02  | 0.07  | 0.03  | 0.07  | 0.06  | -0.03 | 0.28  | 0.03  | -0.02 | -0.03 | -0.02 | 1.00  |

Spearman correlation analysis is conducted based on 174,004 participants after imputation.

RF1 = Tobacco use; RF2 = Alcohol excess; RF3 = Unhealthy diet; RF4 = Low physical activity; RF5 = Long sleep duration; RF6 = Abdominal obesity; RF7 = Hypertension; RF8 = Diabetes; RF9 = High low-density lipoprotein cholesterol; RF10 = Albuminuria; RF11 = Low estimated glomerular filtration rate; RF12 = Low gross domestic product per capita; RF13 = Low education; RF14 = Single, divorced, separated, or widowed; RF15 = Living alone; RF16 = Depression; RF17 = High ambient PM<sub>2.5</sub> air pollution

**Table S7. Multicollinearity diagnostics of all the risk factors, related to STAR Methods**

|             | <b>Eigen Value</b> | <b>Condition Index</b> | <b>Tolerance</b> | <b>Variance Inflation</b> |
|-------------|--------------------|------------------------|------------------|---------------------------|
| <b>RF1</b>  | 1.43               | 2.09                   | 0.89             | 1.13                      |
| <b>RF2</b>  | 1.15               | 2.33                   | 0.89             | 1.12                      |
| <b>RF3</b>  | 1.06               | 2.42                   | 0.97             | 1.03                      |
| <b>RF4</b>  | 0.99               | 2.51                   | 0.97             | 1.04                      |
| <b>RF5</b>  | 0.86               | 2.70                   | 0.95             | 1.05                      |
| <b>RF6</b>  | 0.81               | 2.78                   | 0.96             | 1.04                      |
| <b>RF7</b>  | 0.78               | 2.83                   | 0.92             | 1.09                      |
| <b>RF8</b>  | 0.69               | 3.01                   | 0.94             | 1.06                      |
| <b>RF9</b>  | 0.64               | 3.12                   | 0.98             | 1.02                      |
| <b>RF10</b> | 0.59               | 3.26                   | 0.94             | 1.07                      |
| <b>RF11</b> | 0.58               | 3.28                   | 0.98             | 1.02                      |
| <b>RF12</b> | 0.52               | 3.48                   | 0.89             | 1.12                      |
| <b>RF13</b> | 0.49               | 3.55                   | 0.94             | 1.06                      |
| <b>RF14</b> | 0.45               | 3.71                   | 0.74             | 1.35                      |
| <b>RF15</b> | 0.40               | 3.95                   | 0.75             | 1.34                      |
| <b>RF16</b> | 0.26               | 4.92                   | 1.00             | 1.00                      |
| <b>RF17</b> | 0.07               | 9.56                   | 0.90             | 1.11                      |

Regression analysis is conducted based on 174,004 participants after imputation with all-cause mortality as dependent variables and 17 individual risk factors as independent variables.

RF1 = Tobacco use; RF2 = Alcohol excess; RF3 = Unhealthy diet; RF4 = Low physical activity; RF5 = Long sleep duration; RF6 = Abdominal obesity; RF7 = Hypertension; RF8 = Diabetes; RF9 = High low-density lipoprotein cholesterol; RF10 = Albuminuria; RF11 = Low estimated glomerular filtration rate; RF12 = Low gross domestic product per capita; RF13 = Low education; RF14 = Single, divorced, separated, or widowed; RF15 = Living alone; RF16 = Depression; RF17 = High ambient PM<sub>2.5</sub> air pollution

**Table S8. ICD-10 Codes used in the 4C study for causes of death, related to STAR Methods**

| <b>Causes of death</b>                  | <b>ICD-10 codes</b>                                |
|-----------------------------------------|----------------------------------------------------|
| Cardiovascular disease                  | I00-I99                                            |
| Fatal ischemic heart disease            | I20-I25                                            |
| Fatal stroke                            | I60-I64, I69                                       |
| Fatal congestive heart failure          | I50                                                |
| Other cardiovascular deaths             | I00-I99 (not including I20-I25, I50, I60-I64, I69) |
| Cancer                                  | C00-C97, D00-D09                                   |
| Renal disease                           | N17-N19                                            |
| Diabetes mellitus                       | E10-E14                                            |
| Respiratory disease (exclude pneumonia) | J20-J99                                            |
| Pneumonia                               | J12-J18                                            |
| Other infectious disease                | A00-A99, B00-B09, B20-B99                          |
| Liver disease                           | B15-B19, K70-K77                                   |
| Alzheimer's and related conditions      | F00-F03, G30-G32                                   |
| Injury and external causes              | S00-W99, X00-X59, X85-X99, Y00-Y09, Y85-Y86        |
| Intentional self-harm                   | X60-X84, Y87.0                                     |
| All other causes combined               |                                                    |



**Table S9. Variables used in the imputation algorithm, related to STAR Methods**

|                             |                                                                                                                                                                                                                                                                                                                  |
|-----------------------------|------------------------------------------------------------------------------------------------------------------------------------------------------------------------------------------------------------------------------------------------------------------------------------------------------------------|
| Demographic factors         | age, sex, study center                                                                                                                                                                                                                                                                                           |
| Lifestyle factors           | tobacco use, alcohol consumption, sleep duration, physical activity, and diet score                                                                                                                                                                                                                              |
| Social determinants factors | educational attainment, marital status, living arrangements, urban/rural region, depression, and PM <sub>2.5</sub> air pollution                                                                                                                                                                                 |
| Family medical history      | family history of cancer, family history of diabetes, family history of coronary heart disease, and family history of stroke                                                                                                                                                                                     |
| Health status               | previous diagnosis of diabetes, current oral antidiabetic medication use, current insulin treatment, history of cardiovascular disease, current antihypertensive medication use, current lipid-lowering medication use, history of cancer, and previous diagnosis of hypertension                                |
| Physical examination        | body mass index, waist-to-hip ratio, systolic blood pressure, and diastolic blood pressure                                                                                                                                                                                                                       |
| Biochemical measures        | fasting glucose, 2-hour post-load glucose, hemoglobin A1c, fasting insulin, high-density lipoprotein cholesterol, low-density lipoprotein cholesterol, triglycerides, total cholesterol, alanine transaminase, aspartate transaminase, glutamyl-transpeptidase, urinary albumin-creatinine ratio, and creatinine |
| Outcome at follow-up        | all-cause mortality, ischemic heart disease mortality, stroke mortality, cancer mortality and the time to death or the last follow-up.                                                                                                                                                                           |

## References

1. Kroenke, K., Spitzer, R.L., and Williams, J.B. (2001). The PHQ-9: validity of a brief depression severity measure. *J Gen Intern Med* 16, 606-613. 10.1046/j.1525-1497.2001.016009606.x.
2. World Bank. (2011). GDP per capita (current US\$) – China. <https://data.worldbank.org/indicator/NY.GDP.PCAP.CD?locations=CN>
3. Hammer, M.S., van Donkelaar, A., Li, C., Lyapustin, A., Sayer, A.M., Hsu, N.C., Levy, R.C., Garay, M.J., Kalashnikova, O.V., Kahn, R.A., et al. (2022). Global Annual PM2.5 Grids from MODIS, MISR and SeaWiFS Aerosol Optical Depth (AOD), 1998-2019, V4.GL.03. (NASA Socioeconomic Data and Applications Center (SEDAC)).
4. World Health Organization. (2023). SDG Indicator 11.6.2 Concentrations of fine particulate matter (PM2.5). [https://www.who.int/data/gho/data/indicators/indicator-details/GHO/concentrations-of-fine-particulate-matter-\(pm2-5\)](https://www.who.int/data/gho/data/indicators/indicator-details/GHO/concentrations-of-fine-particulate-matter-(pm2-5)).
5. Lloyd-Jones, D.M., Hong, Y., Labarthe, D., Mozaffarian, D., Appel, L.J., Van Horn, L., Greenlund, K., Daniels, S., Nichol, G., Tomaselli, G.F., et al. (2010). Defining and setting national goals for cardiovascular health promotion and disease reduction: the American Heart Association's strategic Impact Goal through 2020 and beyond. *Circulation* 121, 586-613. 10.1161/circulationaha.109.192703.
6. Bi, Y., Jiang, Y., He, J., Xu, Y., Wang, L., Xu, M., Zhang, M., Li, Y., Wang, T., Dai, M., et al. (2015). Status of cardiovascular health in Chinese adults. *J Am Coll Cardiol* 65, 1013-1025. 10.1016/j.jacc.2014.12.044.
7. Craig, C.L., Marshall, A.L., Sjöström, M., Bauman, A.E., Booth, M.L., Ainsworth, B.E., Pratt, M., Ekelund, U., Yngve, A., Sallis, J.F., and Oja, P. (2003). International physical activity questionnaire: 12-country reliability and validity. *Med Sci Sports Exerc* 35, 1381-1395. 10.1249/01.Mss.0000078924.61453.Fb.
8. Yusuf, S., Joseph, P., Rangarajan, S., Islam, S., Mentz, A., Hystad, P., Brauer, M., Kutty, V.R., Gupta, R., Wielgosz, A., et al. (2020). Modifiable risk factors, cardiovascular disease, and mortality in 155 722 individuals from 21 high-income, middle-income, and low-income countries (PURE): a prospective cohort study. *Lancet* 395, 795-808. 10.1016/s0140-6736(19)32008-2.
9. Lear, S.A., Hu, W., Rangarajan, S., Gasevic, D., Leong, D., Iqbal, R., Casanova, A., Swaminathan, S., Anjana, R.M., Kumar, R., et al. (2017). The effect of physical activity on mortality and cardiovascular disease in 130 000 people from 17 high-income, middle-income, and low-income countries: the PURE study. *Lancet* 390, 2643-2654. 10.1016/s0140-6736(17)31634-3.
10. Leng, Y., Cappuccio, F.P., Wainwright, N.W., Surtees, P.G., Luben, R., Brayne, C., and Khaw, K.T. (2015). Sleep duration and risk of fatal and nonfatal stroke: a prospective study and meta-analysis. *Neurology* 84, 1072-1079. 10.1212/wnl.0000000000001371.
11. Song, Q., Liu, X., Zhou, W., Wang, L., Zheng, X., Wang, X., and Wu, S. (2016). Long Sleep Duration and Risk of Ischemic Stroke and Hemorrhagic Stroke: the Kailuan Prospective Study. *Sci Rep* 6, 33664. 10.1038/srep33664.
12. Qureshi, A.I., Giles, W.H., Croft, J.B., and Bliwise, D.L. (1997). Habitual sleep patterns and risk for stroke and coronary heart disease: a 10-year follow-up from NHANES I. *Neurology* 48, 904-911. 10.1212/wnl.48.4.904.
13. World Health Organization. (2011). Waist Circumference and Waist-hip Ratio. Report of a WHO expert consultation.
14. 2. Classification and Diagnosis of Diabetes: Standards of Medical Care in Diabetes-2019. (2019).

Diabetes Care 42, S13-s28. 10.2337/dc19-S002.

15. Grundy, S.M., Stone, N.J., Bailey, A.L., Beam, C., Birtcher, K.K., Blumenthal, R.S., Braun, L.T., de Ferranti, S., Faiella-Tommasino, J., Forman, D.E., et al. (2019). 2018

AHA/ACC/AACVPR/AAPA/ABC/ACPM/ADA/AGS/APhA/ASPC/NLA/PCNA Guideline on the Management of Blood Cholesterol: A Report of the American College of Cardiology/American Heart Association Task Force on Clinical Practice Guidelines. *Circulation* 139, e1082-e1143.

10.1161/cir.0000000000000625.

16. Mach, F., Baigent, C., Catapano, A.L., Koskinas, K.C., Casula, M., Badimon, L., Chapman, M.J., De Backer, G.G., Delgado, V., Ference, B.A., et al. (2020). 2019 ESC/EAS Guidelines for the management of dyslipidaemias: lipid modification to reduce cardiovascular risk. *Eur Heart J* 41, 111-188.

10.1093/eurheartj/ehz455.

17. Xu, Y., Li, M., Qin, G., Lu, J., Yan, L., Xu, M., Wang, T., Zhao, Z., Dai, M., Zhang, D., et al. (2021). Cardiovascular Risk Based on ASCVD and KDIGO Categories in Chinese Adults: A Nationwide, Population-Based, Prospective Cohort Study. *J Am Soc Nephrol* 32, 927-937. 10.1681/asn.2020060856.

18. Levey, A.S., Stevens, L.A., Schmid, C.H., Zhang, Y.L., Castro, A.F., 3rd, Feldman, H.I., Kusek, J.W., Eggers, P., Van Lente, F., Greene, T., and Coresh, J. (2009). A new equation to estimate glomerular filtration rate. *Ann Intern Med* 150, 604-612. 10.7326/0003-4819-150-9-200905050-00006.
